# Supplementary material
Source: PubMed Central journal article supplement (PMC7724235)
Supplement: CLC-43-1478-s002.pdf [file CLC-43-1478-s002.pdf]

Table 1. Baseline characteristics of studies included in the systematic review.

| Study                | Country        | All   | Male (%) | Severe (%) | Death (%) | average age | HTN (%) | DM (%) | CVD (%) | Cardiac injury (%) | COPD (%) | CKD (%) | Cancer (%) |
|----------------------|----------------|-------|----------|------------|-----------|-------------|---------|--------|---------|--------------------|----------|---------|------------|
| Aggarwal S           | America        | 16    | 75.0     | 50.0       | NA        | 67.0        | 57.0    | 31.0   | NA      | NA                 | 13.0     | 38.0    | 19.0       |
| Alkundi A            | United Kingdom | 232   | 62.5     | NA         | 38.4      | 70.5        | 14.7    | 37.5   | NA      | NA                 | 7.3      | NA      | 3.0        |
| AlSalameh A          | France         | 433   | 55.0     | 18.5       | 20.3      | 72.5        | 59.1    | 26.6   | 45.7    | 8.8                | 9.0      | 15.2    | 16.6       |
| Berenguer, J         | Spain          | 4035  | 61.0     | NA         | 28.0      | 70.0        | 51.2    | 21.8   | NA      | NA                 | 17.9     | NA      | NA         |
| Bhargava A           | America        | 197   | 52.3     | 37.6       | NA        | 60.6        | 70.1    | 37.1   | NA      | 4.6                | 19.3     | NA      | NA         |
| Borobia AM           | Spain          | 2226  | 48.2     | NA         | 20.7      | 61.0        | 41.3    | 17.1   | NA      | NA                 | 6.9      | 7.8     | NA         |
| Buckner FS           | America        | 105   | 50.0     | 48.6       | 33.0      | 69.0        | 59.0    | 33.0   | 38.0    | 19.0               | 10.0     | 26.0    | 15.0       |
| Cai QX               | China          | 298   | 48.7     | 19.5       | 1.0       | 47.5        | 15.8    | 6.0    | 8.4     | 6.7                | NA       | NA      | 1.3        |
| Cao J                | China          | 102   | 52.0     | 17.6       | 16.7      | 54.0        | 27.5    | 10.8   | 4.9     | 14.7               | NA       | 3.9     | NA         |
| Cao Z                | China          | 80    | 47.5     | 33.8       | NA        | 53.0        | 25.0    | 7.5    | 12.5    | NA                 | 6.3      | NA      | NA         |
| Cen Y                | China          | 1007  | 49.0     | 24.2       | 4.3       | 67.0        | 26.8    | 11.8   | NA      | NA                 | 4.6      | 1.4     | NA         |
| Chen F               | China          | 660   | 44.7     | NA         | 12.4      | 55.0        | 34.8    | 17.3   | NA      | NA                 | 6.5      | NA      | NA         |
| Chen FF              | China          | 681   | 53.2     | NA         | 15.3      | 65.0        | 43.0    | 16.7   | NA      | 20.4               | 2.2      | 4.0     | NA         |
| Chen Q               | China          | 145   | 54.5     | 29.6       | NA        | 47.5        | 15.2    | 9.7    | NA      | NA                 | 4.1      | 2.1     | NA         |
| Chen R               | China          | 1590  | 56.9     | NA         | 3.1       | 69.0        | 16.9    | 8.2    | NA      | NA                 | 1.5      | 1.3     | NA         |
| Chen T               | China          | 274   | 62.4     | NA         | 41.2      | 62.0        | 33.9    | 17.2   | 8.4     | 44.0               | 6.6      | 1.5     | 2.6        |
| Chen TL              | China          | 203   | 53.2     | 52.7       | NA        | 54.0        | 21.2    | 7.9    | 7.9     | NA                 | 3.9      | 3.9     | 3.4        |
| Chen X               | China          | 291   | 49.8     | 17.2       | 0.7       | 46.0        | 13.4    | 7.6    | 4.1     | NA                 | 3.4      | 0.7     | 0.7        |
| Chen XH              | China          | 48    | 77.1     | 56.3       | 6.3       | 64.6        | 49.7    | 25.0   | NA      | NA                 | NA       | NA      | 12.5       |
| Chilimuri S          | America        | 375   | 63.0     | NA         | 42.7      | 63.0        | 60.0    | 47.0   | 17.0    | NA                 | 17.0     | 14.0    | NA         |
| Ciardullo S          | Italy          | 373   | 65.4     | NA         | 38.1      | 72.0        | 64.8    | 18.5   | 37.7    | NA                 | 10.6     | 12.9    | 13.6       |
| Ciceri F             | Italy          | 410   | 72.9     | NA         | 23.2      | 65.0        | 49.9    | 15.0   | NA      | NA                 | 5.4      | 11.8    | 5.4        |
| Colaneri M           | Italy          | 44    | 63.6     | 38.6       | 4.5       | 67.5        | 34.1    | 15.9   | 25.0    | NA                 | NA       | NA      | 13.6       |
| Covino M             | Italy          | 69    | 53.6     | 79.7       | 33.3      | 84.0        | 59.4    | 13.0   | NA      | NA                 | 10.1     | NA      | 4.3        |
| Deng G               | China          | 44672 | 51.4     | 18.5       | 2.3       | NA          | 12.8    | 5.3    | 4.2     | 2.4                | NA       | NA      | 0.5        |
| Deng Y               | China          | 225   | 55.0     | NA         | 48.4      | 48.5        | 25.8    | 11.6   | 7.6     | 29.3               | 7.0      | NA      | 3.6        |
| Du RH                | China          | 179   | 54.2     | NA         | 11.3      | 57.6        | 32.4    | 18.4   | 16.2    | NA                 | NA       | 2.2     | 2.2        |
| Escalera-Antezana JP | Bolivia        | 107   | 51.4     | NA         | NA        | 43.9        | 9.4     | 4.7    | NA      | NA                 | NA       | NA      | NA         |
| Fan H                | China          | 73    | 67.1     | NA         | 64.4      | 58.4        | 32.9    | 16.4   | 9.6     | NA                 | NA       | NA      | NA         |
| Feng Y               | China          | 476   | 56.9     | 26.1       | 8.0       | 53.0        | 23.7    | 10.3   | 8.0     | NA                 | 4.6      | NA      | 2.5        |

|                |            |      |      |       |       |      |      |      |      |      |      |      |      |
|----------------|------------|------|------|-------|-------|------|------|------|------|------|------|------|------|
| Fu L           | China      | 200  | 49.5 | NA    | 16.0  | 59.6 | 50.5 | 68.5 | 8.0  | NA   | 4.0  | NA   | NA   |
| Gao C          | China      | 2877 | 51.1 | 25.9  | 1.9   | NA   | 29.5 | 13.5 | NA   | 0.4  | 1.1  | 1.0  | 1.7  |
| Gao S          | China      | 210  | 48.0 | 9.0   | 16.7  | 71.0 | 55.0 | 18.0 | 25.0 | NA   | 1.0  | 9.0  | 3.0  |
| Gao Y          | China      | 43   | 60.5 | 34.9  | NA    | 45.0 | 30.2 | 16.3 | 69.8 | NA   | 18.6 | NA   | NA   |
| Gayam V        | America    | 408  | 56.6 | 28.8  | 67.6  | 67.0 | 66.4 | 43.2 | NA   | NA   | 10.6 | 16.9 | NA   |
| Ghweil AA      | Egypt      | 66   | 72.7 | 45.5  | 3.0   | NA   | 16.7 | 16.7 | NA   | NA   | NA   | NA   | NA   |
| Grasselli G    | Italy      | 3988 | 79.9 | NA    | 48.3  | 63.0 | 42.1 | 12.9 | NA   | NA   | 2.3  | 2.2  | 8.3  |
| Gregoriano C   | Switzerlan | 99   | 63.0 | 35.4  | 19.0  | 67.0 | 57.0 | 22.0 | NA   | NA   | 7.0  | 28.0 | 11.0 |
| Guan WJ        | China      | 1590 | 57.3 | 16.0  | 3.1   | 48.9 | 20.9 | 8.2  | 3.7  | NA   | 1.5  | 1.3  | 1.1  |
| Guo T          | China      | 187  | 48.7 | NA    | 23.0  | 58.5 | 32.6 | 15.0 | NA   | 27.8 | 2.1  | 3.2  | 7.0  |
| Guo W          | China      | 174  | 43.7 | NA    | 5.2   | 59.0 | 24.7 | 21.2 | 18.4 | NA   | NA   | 7.5  | 4.6  |
| Gupta S        | America    | 2215 | 64.8 | NA    | 35.4  | 60.5 | 59.7 | 38.9 | NA   | NA   | 7.8  | 12.6 | 5.1  |
| Halvatsiotis P | Greece     | 90   | 80.0 | NA    | 28.9  | 65.5 | 50.0 | 18.9 | 21.1 | NA   | 8.9  | 4.4  | 7.8  |
| Hu H           | China      | 105  | 50.9 | NA    | 18.1  | 60.8 | 26.7 | 3.8  | 5.7  | NA   | 11.4 | NA   | 5.7  |
| Hu L           | China      | 323  | 51.4 | 53.3  | 10.8  | 61.0 | 32.5 | 14.6 | 12.7 | 7.4  | 1.9  | 2.2  | 1.5  |
| Huang H        | China      | 64   | 57.8 | 32.8  | 3.1   | 47.8 | 21.9 | 9.4  | NA   | NA   | NA   | 4.8  | 4.8  |
| Huang R        | China      | 202  | 57.4 | 11.4  | 0.0   | 44.0 | 14.4 | 9.4  | 2.5  | NA   | 3.5  | NA   | 1.0  |
| Huang S        | China      | 310  | 56.1 | 50.0  | 18.7  | 62.0 | 36.5 | 15.5 | 6.1  | NA   | NA   | NA   | 0.3  |
| Iaccarino G    | Italy      | 1591 | 64.0 | NA    | 11.8  | 66.5 | 54.9 | 16.9 | NA   | NA   | 7.7  | 5.5  | NA   |
| Inciardi RM    | Italy      | 99   | 81.0 | 19.0  | 26.0  | 67.0 | 64.0 | 31.0 | NA   | NA   | 9.0  | 15.0 | 18.0 |
| Itelman E      | Israel     | 162  | 64.8 | 16.0  | 3.1   | 52.0 | 30.2 | 18.5 | NA   | NA   | 1.2  | 1.2  | NA   |
| Jang JG        | Korea      | 110  | 43.6 | 20.9  | 7.3   | 56.9 | 33.6 | 26.4 | 9.1  | NA   | 3.6  | NA   | 5.5  |
| Javanian M     | Iran       | 100  | 51.0 | NA    | 19.0  | 60.1 | 32.0 | 37.0 | 20.0 | 14.0 | 12.0 | 12.0 | 4.0  |
| Ji W           | Korea      | 7341 | 40.5 | 13.0  | NA    | 47.1 | 22.2 | 14.2 | NA   | NA   | NA   | NA   | 4.6  |
| Kalyanaraman   | America    | 6284 | 62.0 | NA    | 28.0  | 61.0 | 37.0 | 33.0 | 24   | NA   | 4    | 11   | 10.0 |
| Kim MK         | Korea      | 1082 | 35.5 | 14.7  | 7.9   | NA   | 37.2 | 21.7 | 6.8  | NA   | 6.7  | 3.0  | 5.5  |
| Lee JY         | Korea      | 694  | 24.8 | 19.7  | 2.6   | 52.1 | 18.9 | 11.7 | NA   | NA   | 0.6  | 0.7  | 3.3  |
| Lee JY (2)     | Korea      | 98   | 44.9 | NA    | 28.4  | 72.0 | 52.0 | 27.6 | 16.3 | NA   | 8.2  | 6.1  | 11.2 |
| Li J           | China      | 362  | 52.2 | 47.8  | 21.3  | 66.0 | NA   | 35.1 | NA   | NA   | 5    | 9.7  | 3    |
| Li J (2)       | China      | 596  | 47.0 | 6.9   | 9.1   | 58.0 | NA   | 13.1 | 36.1 | 21.1 | 0.7  | 1.8  | 4.5  |
| Li J (3)       | China      | 74   | 66.0 | 100.0 | 18.9  | 59.5 | 47.3 | 18.9 | NA   | NA   | NA   | NA   | 2.7  |
| Li K           | China      | 102  | 58.0 | NA    | 14, 7 | 57.0 | 30.0 | 15.0 | 4.0  | NA   | 2.0  | NA   | 5.0  |
| Li KH          | China      | 83   | 53.0 | 30.1  | NA    | 45.5 | 6.0  | 7.8  | 0.0  | NA   | 6.0  | NA   | NA   |
| Li Q           | China      | 325  | 51.4 | 8.0   | 0.9   | 51.0 | 24.0 | 9.2  | 5.5  | 9.2  | 1.2  | 1.2  | 0.9  |
| Li T           | China      | 312  | 59.9 | 33.7  | 6.7   | 69.2 | 57.1 | 38.8 | 29.8 | 33.0 | 8.7  | 3.2  | 3.9  |
| Liu J          | China      | 1190 | 53.4 | 3.9   | 13.2  | 57.0 | 26.1 | 12.2 | 7.3  | NA   | 1.9  | 2.6  | 2.9  |

|                |                                    |      |      |       |      |      |      |      |      |      |      |      |      |
|----------------|------------------------------------|------|------|-------|------|------|------|------|------|------|------|------|------|
| Liu JY         | China                              | 61   | 50.8 | 27.9  | NA   | 40.0 | 19.7 | 8.2  | 1.6  | NA   | 8.2  | NA   | NA   |
| Liu L          | China                              | 51   | 62.7 | 13.7  | NA   | 45.0 | 7.8  | 7.8  | NA   | NA   | NA   | NA   | NA   |
| Lv Z           | China                              | 354  | 49.4 | 43.8  | 3.1  | 62.0 | 20.9 | 9.9  | NA   | NA   | 1.7  | NA   | 0.6  |
| Ma KL          | China                              | 84   | 57.1 | 23.8  | NA   | 48.0 | 14.3 | 11.9 | 6.0  | 42.9 | 6.0  | 1.2  | 1.2  |
| Mao L          | China                              | 214  | 40.7 | 41.1  | NA   | 52.7 | 23.8 | 14.0 | 7.0  | NA   | NA   | 2.8  | 6.1  |
| Mehra MR       | Asia,<br>Europe,<br>and<br>America | 8910 | 59.9 | NA    | 5.8  | NA   | 26.3 | 14.3 | NA   | NA   | 2.3  | NA   | NA   |
| Mikami T       | America                            | 2820 | 48.9 | NA    | 28.6 | NA   | 33.0 | 23.3 | NA   | NA   | 3.8  | 11.2 | 6.9  |
| Nowak B        | Poland                             | 169  | 51.5 | 16.0  | 27.2 | 63.7 | 47.3 | 18.9 | 34.3 | NA   | 13.0 | 20.7 | 20.7 |
| Pan F          | China                              | 124  | 68.5 | 73.4  | 71.8 | 68.0 | 50.0 | 20.2 | 15.3 | NA   | 8.9  | NA   | NA   |
| Pellaud C      | Switzerlan                         | 196  | 61.0 | 25.0  | 16.8 | 70.0 | 60.0 | 27.0 | NA   | NA   | 8.0  | NA   | 8.0  |
| Qin C          | China                              | 452  | 52.0 | 63.3  | NA   | 58.0 | 29.5 | 16.4 | 5.9  | NA   | 2.6  | 2.2  | 3.1  |
| Ruan Q         | China                              | 150  | 68.0 | NA    | 45.3 | NA   | 34.7 | 16.7 | 8.7  | NA   | 3.0  | 3.0  | 3.0  |
| Schalekamp S   | Netherlan                          | 356  | 67.0 | 47.0  | 27.2 | 69.0 | 37.4 | 18.5 | 27.8 | NA   | 19.4 | 14.3 | NA   |
| Shah P         | America                            | 522  | 41.8 | 23.6  | 17.6 | 63.0 | 79.7 | 42.3 | NA   | NA   | 9.0  | 14.9 | 9.2  |
| Shahriarirad R | Iran                               | 113  | 62.8 | 9.7   | 8.0  | 53.8 | 19.5 | 14.2 | 14.2 | NA   | 8.0  | 5.3  | 0.9  |
| Shi S          | China                              | 416  | 49.3 | NA    | 13.7 | 64.0 | 30.5 | 14.4 | NA   | 19.7 | 2.9  | 3.4  | 2.2  |
| Shi S (2)      | China                              | 671  | 48.0 | 100.0 | 9.2  | 63.0 | 29.7 | 14.5 | NA   | NA   | 3.4  | 4.2  | 3.4  |
| Shi Y          | China                              | 487  | 53.2 | 10.1  | NA   | 46.0 | 20.3 | 6.0  | 2.3  | NA   | NA   | 1.4  | 1.0  |
| Sun H          | China                              | 244  | 51.4 | NA    | 49.6 | NA   | 56.6 | 20.9 | NA   | NA   | NA   | NA   | NA   |
| Tabata S       | Japan                              | 71   | 55.0 | 39.4  | NA   | 67.0 | NA   | 3.0  | 31.0 | NA   | NA   | NA   | 4.0  |
| Tian J         | China                              | 751  | 50.0 | 42.0  | 14.0 | 64.0 | 39.0 | 26.0 | NA   | NA   | 1.0  | 3.0  | 30.9 |
| Wan S          | China                              | 135  | 53.3 | 29.6  | 0.7  | 47.0 | 9.6  | 8.9  | 5.2  | 7.4  | 0.7  | NA   | 3.0  |
| Wang B         | China                              | 483  | 45.1 | 12.8  | NA   | 48.4 | 7.0  | 5.0  | NA   | NA   | NA   | NA   | 1.0  |
| Wang D         | China                              | 107  | 53.3 | NA    | 17.8 | 51.0 | 24.3 | 10.3 | 12.1 | 11.2 | 2.8  | 2.8  | NA   |
| Wang K         | China                              | 548  | 50.9 | NA    | 14.2 | 60.0 | 30.3 | 15.1 | NA   | 21.7 | 3.1  | 1.8  | 4.4  |
| Wang K (2)     | China                              | 296  | 47.3 | NA    | 6.4  | 47.3 | 14.2 | 10.1 | NA   | NA   | 0.7  | 1.7  | 0.3  |
| Wang W         | China                              | 421  | 50.8 | 14.0  | NA   | 52.0 | 10.5 | 3.1  | NA   | NA   | 4.3  | NA   | 1.0  |
| Wang Y         | China                              | 334  | 52.0 | NA    | 39.0 | 64.0 | 41.0 | 18.6 | 11.6 | 32.3 | 4.7  | NA   | NA   |
| Wang YF        | China                              | 110  | 43.6 | 34.5  | 65.3 | NA   | 20.9 | 13.7 | NA   | NA   | 5.5  | NA   | NA   |
| Wang YP        | China                              | 275  | 46.5 | 16.4  | 0.0  | 49.0 | 19.6 | 6.2  | NA   | NA   | NA   | 1.5  | 0.7  |
| Wei JF         | China                              | 101  | 53.5 | 36.6  | 3.0  | 49.0 | 21.0 | 13.9 | NA   | 5.9  | 1.0  | NA   | NA   |
| Wei Y          | China                              | 276  | 56.2 | 5.1   | 1.8  | 51.0 | 17.0 | 5.1  | NA   | NA   | 2.5  | NA   | 1.1  |
| Wu C           | China                              | 201  | 63.7 | 41.7  | 21.9 | 51.0 | 19.4 | 10.9 | 4.0  | NA   | 2.5  | 1.0  | 0.5  |
| Xie H          | China                              | 79   | 55.7 | 35.4  | NA   | 60.0 | 17.7 | 10.1 | NA   | NA   | NA   | NA   | NA   |

|          |       |      |      |       |      |      |      |      |      |      |     |      |      |
|----------|-------|------|------|-------|------|------|------|------|------|------|-----|------|------|
| Xie Y    | China | 62   | 43.5 | 38.7  | 3.2  | 66.0 | 38.7 | 21.0 | 53.2 | NA   | NA  | NA   | NA   |
| Xu J     | China | 239  | 59.8 | 100.0 | 61.5 | 62.5 | 43.9 | 5.4  | 14.6 | NA   | 5.0 | NA   | 18.4 |
| Xu PP    | China | 703  | 54.0 | 15.2  | 4.7  | 46.1 | 17.0 | 9.0  | 5.0  | NA   | 2.0 | 1.0  | 1.0  |
| Yang Q   | China | 136  | 48.5 | 33.2  | 16.9 | 56.0 | 27.1 | 14.7 | 6.6  | 8.1  | NA  | 2.9  | 2.9  |
| Yang X   | China | 52   | 67.0 | 100.0 | 61.5 | 59.7 | NA   | 0.2  | 10.0 | 23.0 | 8.0 | NA   | 4.0  |
| Yao Q    | China | 108  | 39.8 | 12.0  | 11.8 | 52.0 | 14.8 | 4.6  | 3.7  | 7.2  | 2.8 | NA   | 1.9  |
| Ye C     | China | 856  | 51.3 | 18.0  | 0.1  | 46.0 | 16.6 | 7.5  | 1.5  | NA   | NA  | 0.8  | 0.9  |
| Yu C     | China | 1663 | 50.4 | 52.0  | 10.2 | 64.0 | 20.9 | 14.7 | NA   | NA   | 3.7 | 1.9  | 1.1  |
| Yu C (2) | China | 1464 | 50.3 | NA    | 14.5 | 64.0 | 20.9 | 14.4 | NA   | NA   | 3.4 | 1.8  | 1.2  |
| Yu X     | China | 333  | 51.7 | 7.8   | 0.6  | 50.0 | 19.2 | 8.4  | 7.2  | NA   | NA  | NA   | NA   |
| Yuan M   | China | 27   | 45.0 | NA    | 37.0 | 60.0 | 19.0 | 22.0 | 11.0 | NA   | NA  | NA   | 4.0  |
| Zhang F  | China | 48   | 68.7 | 45.8  | 35.4 | 70.6 | 66.7 | 20.8 | NA   | 27.1 | NA  | 10.4 | NA   |
| Zhang GQ | China | 221  | 48.9 | 24.9  | 5.4  | 55.0 | 24.4 | 10.0 | 10.0 | 7.7  | 2.7 | 2.7  | 4.1  |
| Zhang JJ | China | 140  | 50.7 | 41.4  | NA   | 57.0 | 30.0 | 12.1 | NA   | 5.0  | 1.4 | 1.4  | NA   |
| Zhang SY | China | 788  | 51.6 | 9.9   | 0.0  | NA   | 16.0 | 7.2  | 1.4  | NA   | 0.4 | 0.9  | 0.8  |
| Zhang XY | China | 91   | 53.8 | 33.0  | 2.2  | 46.0 | 19.8 | 3.3  | NA   | 15.4 | 1.0 | 1.0  | 3.3  |
| Zhang Y  | China | 258  | 53.5 | 66.3  | 5.8  | 64.0 | 38.0 | 24.4 | 15.1 | 7.4  | 3.5 | 3.5  | 4.7  |
| Zhao J   | China | 29   | 48.3 | 72.4  | 3.4  | 56.0 | NA   | 24.1 | 34.5 | NA   | NA  | NA   | NA   |
| Zhao W   | China | 77   | 44.2 | 26.0  | NA   | 52.0 | 20.8 | 7.8  | 11.7 | NA   | 7.8 | 6.5  | 5.2  |
| Zheng F  | China | 161  | 49.7 | 18.6  | NA   | 45.0 | 13.7 | 4.3  | NA   | NA   | 3.7 | NA   | NA   |
| Zheng S  | China | 96   | 60.0 | 77.1  | NA   | 55.0 | 36.0 | 11.0 | 7.0  | NA   | 4.0 | 1.0  | 1.0  |
| Zhu L    | China | 7337 | 47.4 | 8.5   | 3.4  | 54.0 | 24.0 | 13.0 | NA   | 3.5  | 0.8 | 1.8  | NA   |
| Zhu Z    | China | 127  | 35.4 | 12.6  | NA   | 50.9 | 24.4 | 7.9  | 4.7  | NA   | 4.7 | NA   | 3.9  |

CVD: cardiovascular disease; COPD: chronic obstructive pulmonary disease; CKD: chronic kidney disease; NA: not available.

sTable 2: The pooled outcome in patients with comorbidities or cardiac injury.

| Co-morbidity           | Effect size |              |         | Publication bias |
|------------------------|-------------|--------------|---------|------------------|
|                        | OR          | 95% CI       | P-value | P (Egger's test) |
| <b>Severe COVID-19</b> |             |              |         |                  |
| Hypertension           | 2.565       | 2.117-3.108  | 0.000   | 0.360            |
| DM                     | 2.542       | 1.893-3.414  | 0.000   | 0.001            |
| CVD                    | 3.863       | 2.704-5.518  | 0.000   | 0.411            |
| COPO                   | 2.710       | 1.984-3.702  | 0.000   | 0.698            |
| CKD                    | 2.196       | 1.268-3.802  | 0.005   | 0.228            |
| Cancer                 | 2.416       | 1.815-3.217  | 0.000   | 0.552            |
| Cardiac injury         | 6.568       | 3.704-11.646 | 0.000   | 1.000            |
| <b>Mortality</b>       |             |              |         |                  |
| Hypertension           | 2.504       | 2.017-3.109  | 0.000   | 0.542            |
| DM                     | 2.087       | 1.803-2.416  | 0.000   | 0.991            |
| CVD                    | 2.654       | 1.869-3.769  | 0.000   | 1.000            |
| COPO                   | 2.478       | 2.047-2.999  | 0.000   | 0.840            |
| CKD                    | 3.072       | 2.434-3.878  | 0.000   | 0.66             |
| Cancer                 | 1.900       | 1.572-2.297  | 0.000   | 0.247            |
| Cardiac injury         | 16.959      | 7.892-36.441 | 0.000   | 1.000            |
